# Supplementary material for: A corrosion-etching strategy for fabricating RuO2 coupled with defective NiFeZn(OH)x for a highly efficient hydrogen evolution reaction
Source: Royal Society of Chemistry journal article supplement (doi:10.1039/d2ta04789f), 2022-01-01
Supplement: d2ta04789f1.pdf [file d2ta04789f1.pdf]

## Supplementary Information

### Corrosion-etching strategy for fabricating RuO<sub>2</sub> coupled with defective NiFeZn(OH)<sub>x</sub> for highly efficient hydrogen evolution reaction

Xiaofeng Li<sup>a, †</sup>, Xupo Liu<sup>a, †</sup>, Cuicui Zhang<sup>a</sup>, Ran Wang<sup>a</sup>, Gangya Wei<sup>b</sup>, Tianfang Yang<sup>b</sup>, Jing Zhang<sup>a</sup>, Ye Chen<sup>a</sup>, Shuyan Gao<sup>a,\*</sup>

<sup>a</sup>School of Materials Science and Engineering, Henan Normal University, Xinxiang, Henan 453007, P.R. China

<sup>b</sup>School of Chemistry and Chemical Engineering, Henan Normal University, Xinxiang, Henan 453007, P.R. China

†Xiaofeng Li and Xupo Liu contributed equally to the work.

\*Corresponding author, E-mail: shuyangao@htu.cn

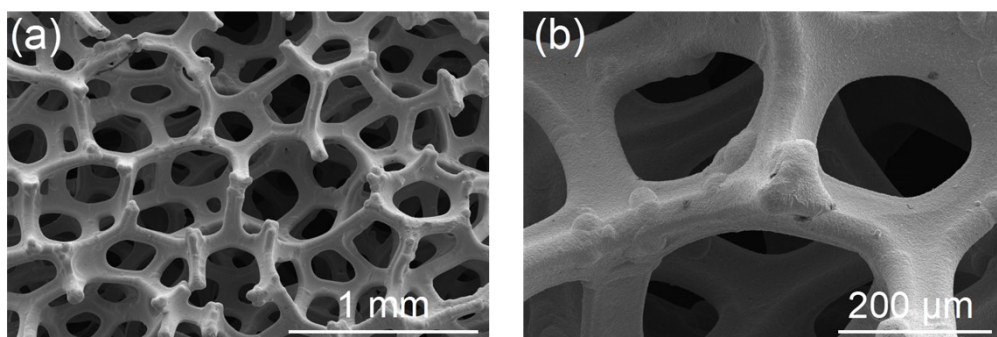

**Fig. S1.** Low (a) and high (b) resolution SEM images of NFF.

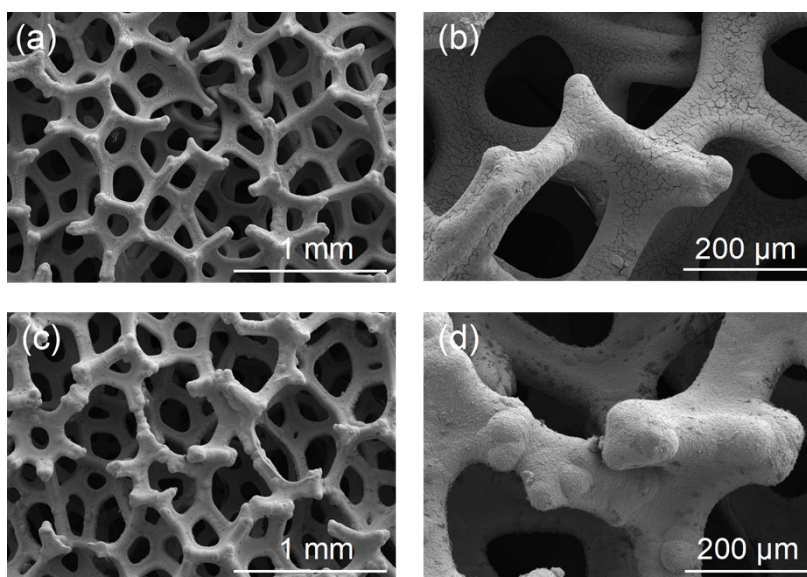

**Fig. S2.** SEM images of (a-b) NFF-Ru and (c-d) NFF-Ru-Zn.

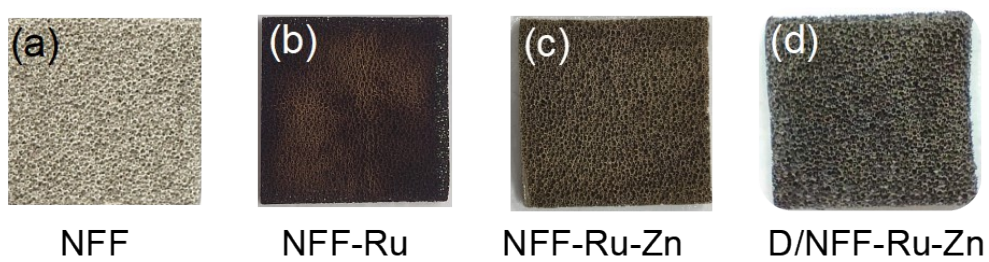

**Fig. S3.** Photographs of (a) NFF, (b) NFF-Ru, (c) NFF-Ru-Zn, and (d) D/NFF-Ru-Zn.

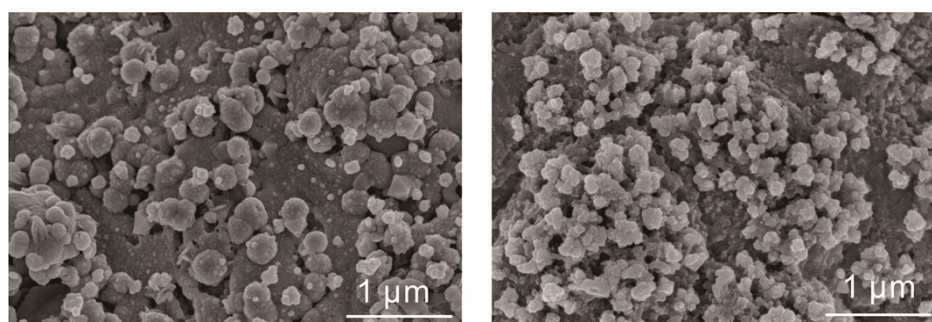

**Fig. S4.** SEM images of D/NFF-Ru-Zn.

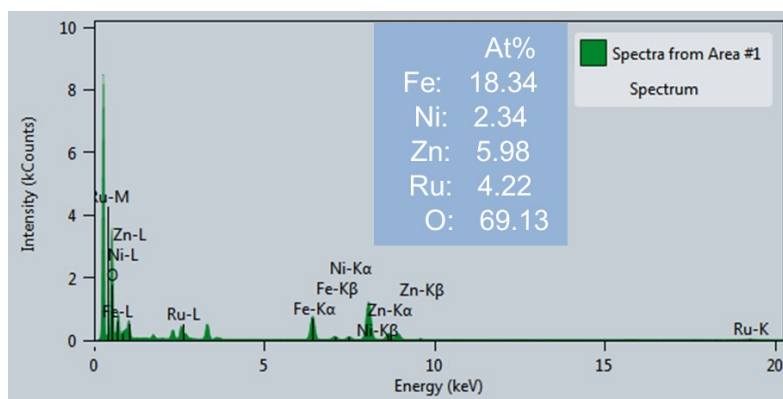

**Fig. S5.** EDX spectrum of the D/NFF-Ru-Zn.

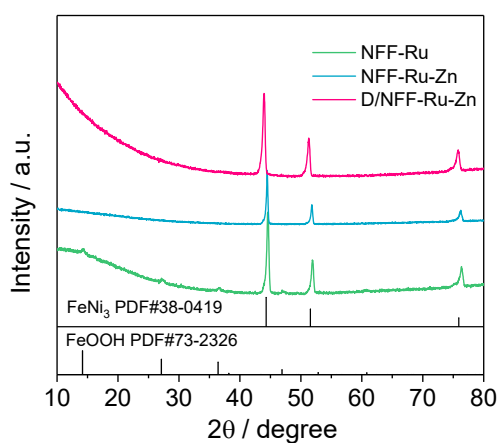

**Fig. S6.** XRD spectra of the NFF-Ru, NFF-Ru-Zn, and D/NFF-Ru-Zn.

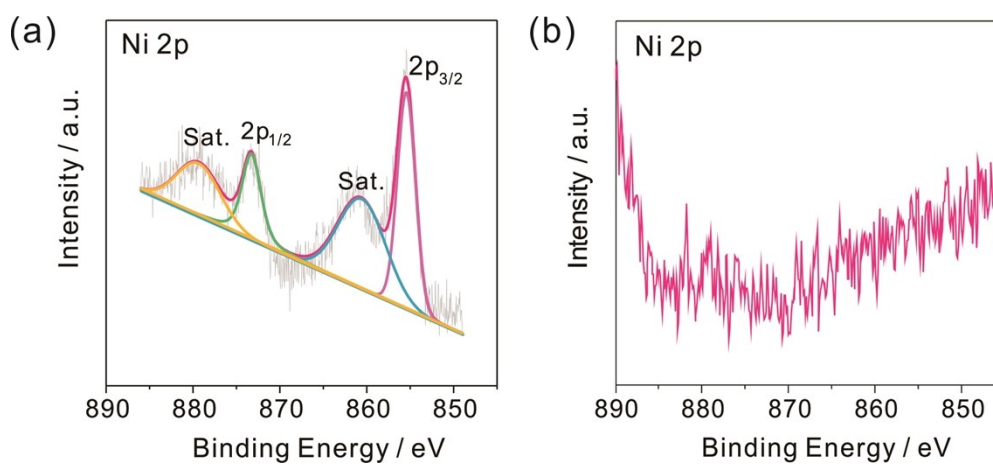

**Fig. S7.** Ni 2p XPS spectra of (a) D/NFF-Ru-Zn and (b) NFF-Ru-Zn.

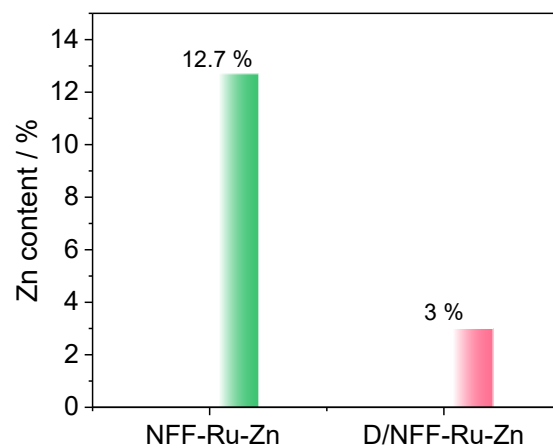

**Fig. S8.** Zn content in NFF-Ru-Zn and D/NFF-Ru-Zn obtained by XPS analysis.

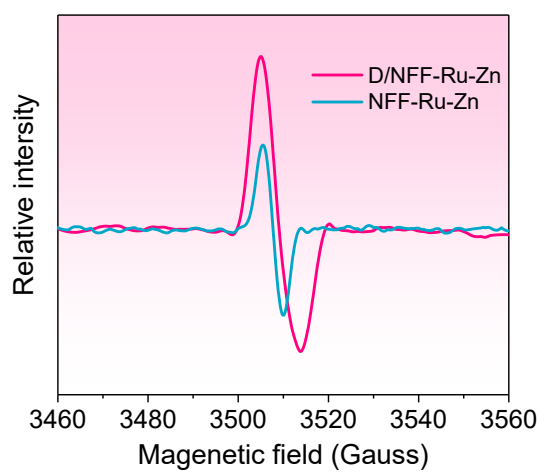

**Fig. S9.** Electron paramagnetic resonance of NFF-Ru-Zn and D/NFF-Ru-Zn.

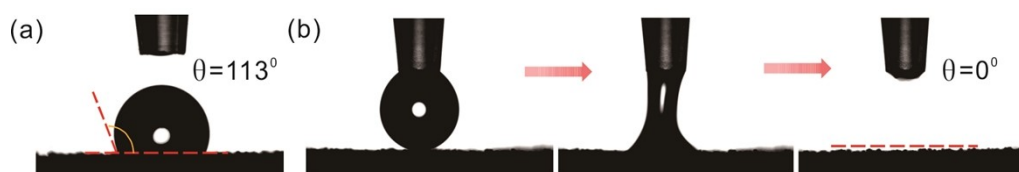

**Fig. S10.** Contact angles of (a) NFF and (b) D/NFF-Ru-Zn.

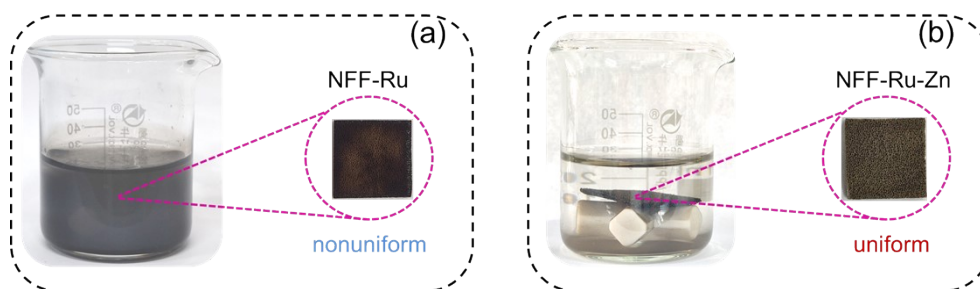

**Fig. S11.** Photographs of (a) NFF-Ru and (b) NFF-Ru-Zn.

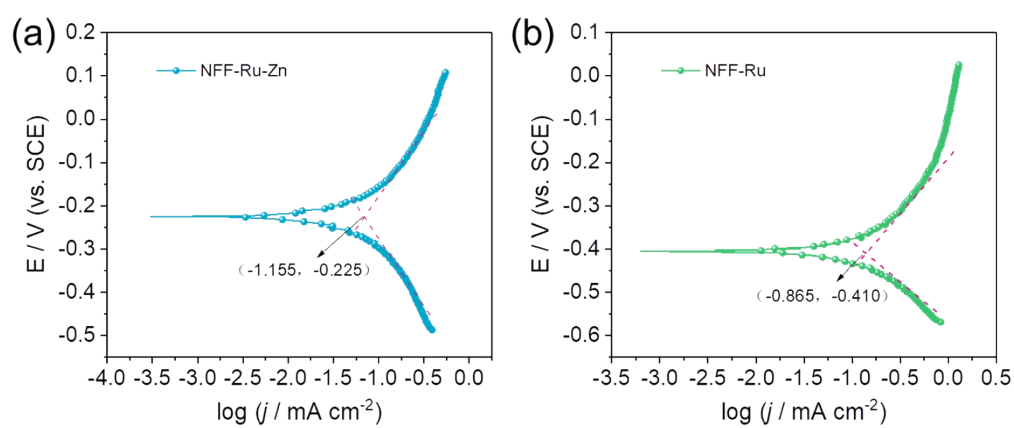

**Fig. S12.** Corrosion polarization curves of NFF in the solutions of (a)  $\text{RuCl}_3\text{-ZnSO}_4$  and (b)  $\text{RuCl}_3$ , respectively.

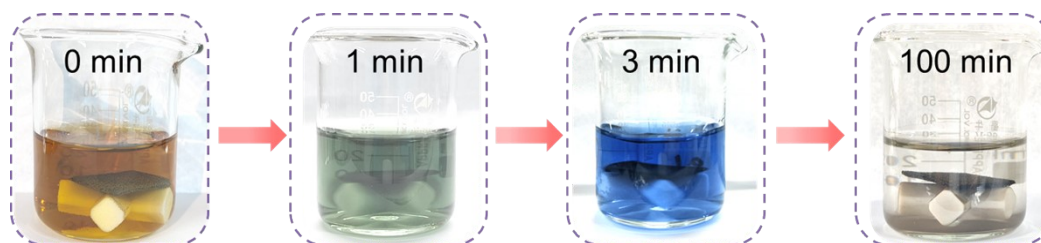

**Fig. S13.** Color changes of the “ $\text{RuCl}_3\text{-ZnSO}_4$ ” solution in the preparation of NFF-Ru-Zn.

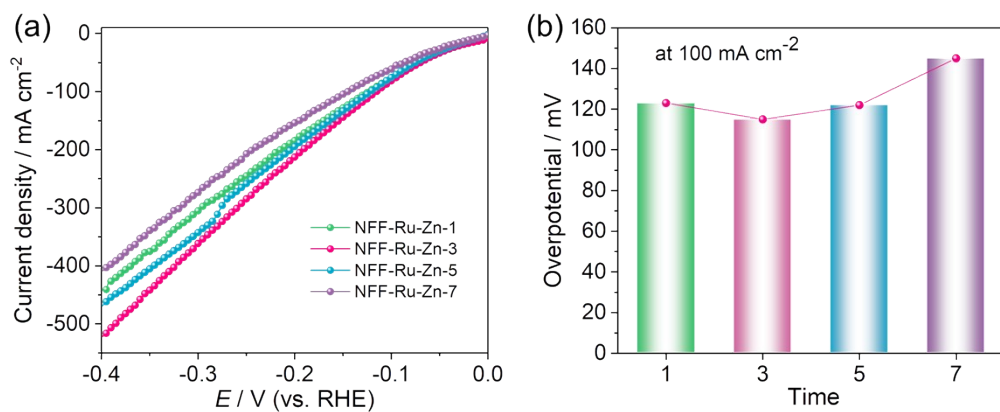

**Fig. S14.** (a) HER polarization curves of NFF-Ru-Zn under different corrosion time. (b) Comparison of overpotentials at the current density of  $100 \text{ mA cm}^{-2}$ .

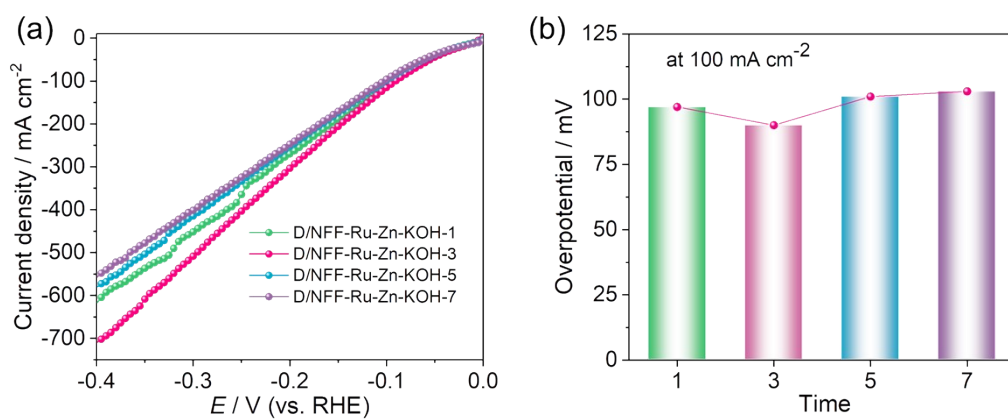

**Fig. S15.** (a) HER polarization curves of D/NFF-Ru-Zn under different etching time. (b) Comparison of overpotentials at the current density of  $100 \text{ mA cm}^{-2}$ .

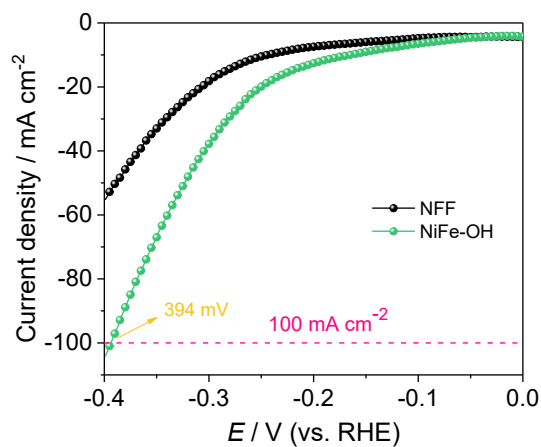

**Fig. S16.** HER polarization curves of NFF and NiFe-OH.

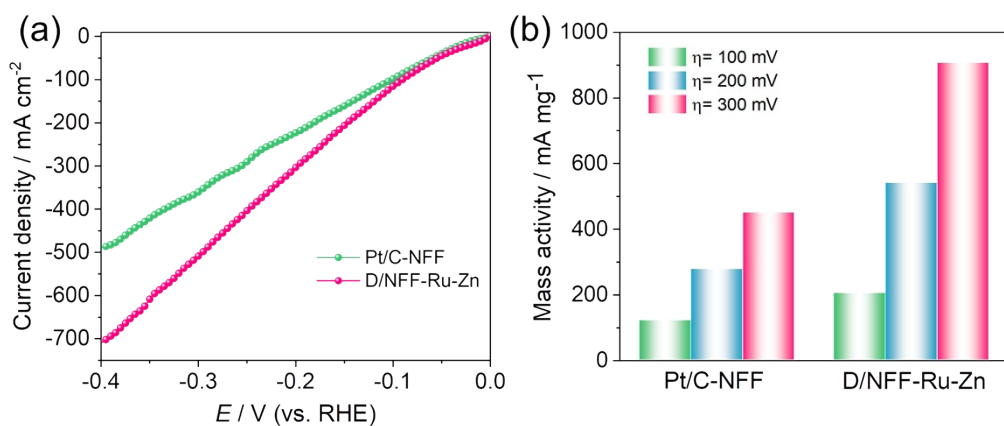

**Fig. S17.** (a) LSV polarization curves and (b) mass activity of D/NFF-Ru-Zn and Pt/C-NFF (40% Pt) at overpotentials of 100, 200, and 300 mV.

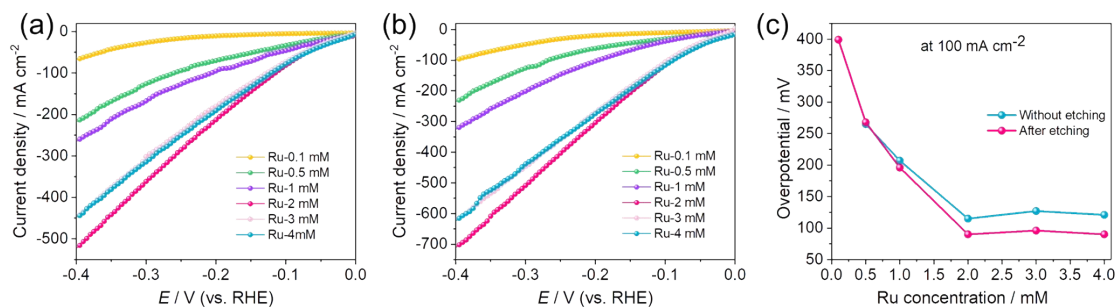

**Fig. S18.** HER polarization curves of (a) NFF-Ru-Zn and (b) D/NFF-Ru-Zn with different Ru concentrations. (c) Comparison of overpotentials at  $100 \text{ mA cm}^{-2}$  for NFF-Ru-Zn and D/NFF-Ru-Zn with different Ru concentrations.

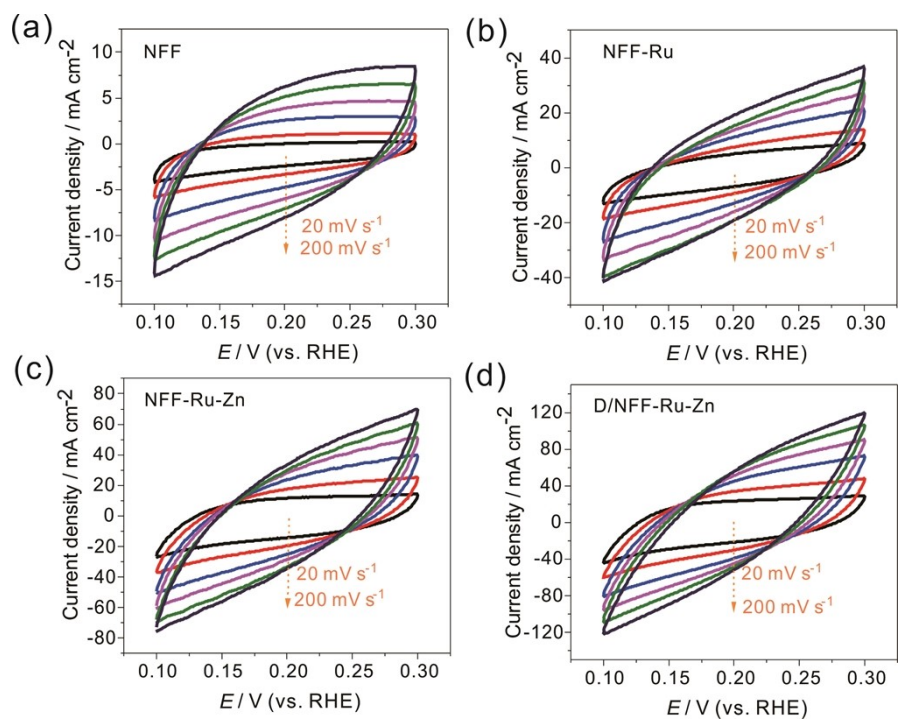

**Fig. S19.** CV curves of (a) NFF, (b) NFF-Ru, (c) NFF-Ru-Zn and (d) D/NFF-Ru-Zn catalysts in the potential range of 0.1~0.3 V with the scanning rates of 20~200  $\text{mV s}^{-1}$ .

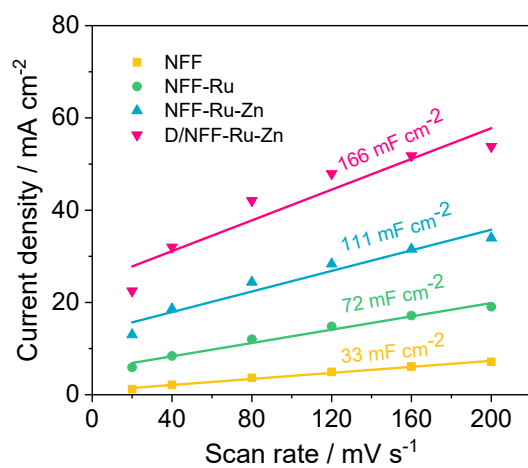

**Fig. S20.** The  $C_{dl}$  values of samples at various scanning rates.



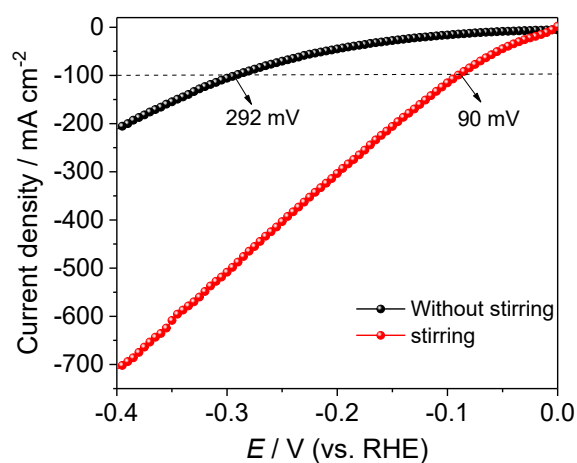

**Fig. S21.** HER polarization curves of D/NFF-Ru-Zn catalyst with and without stirring.

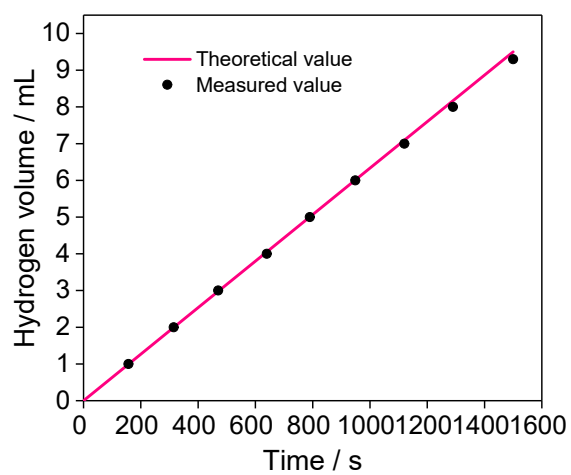

**Fig. S22.** The volume of theoretical H<sub>2</sub> and experimentally measured H<sub>2</sub> along with the reaction time.

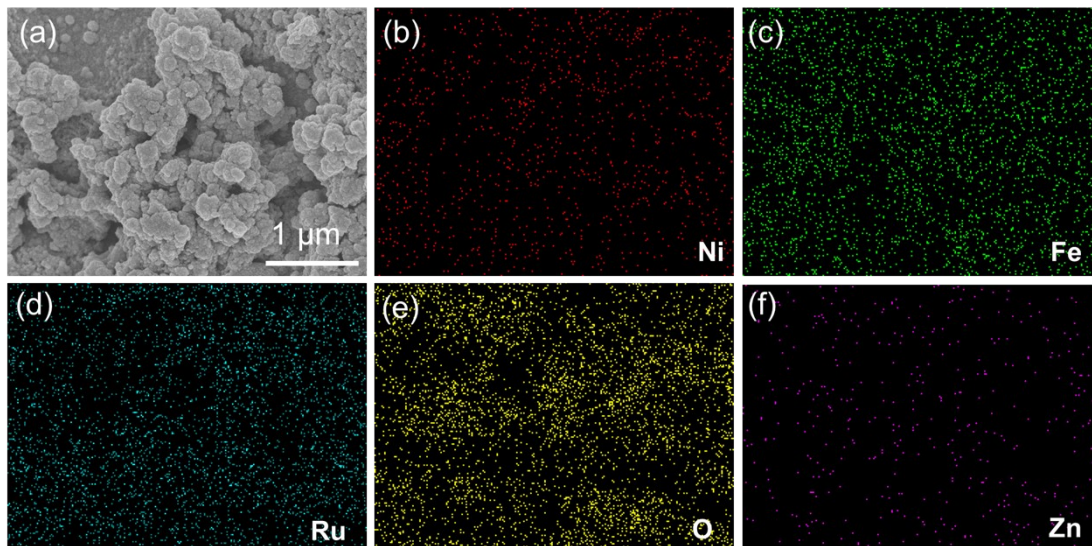

**Fig. S23.** (a) SEM images, (b-f) corresponding mapping images of Ni, Fe, Ru, O and Zn elements in the D/NFF-Ru-Zn after HER stability test for 100 h.

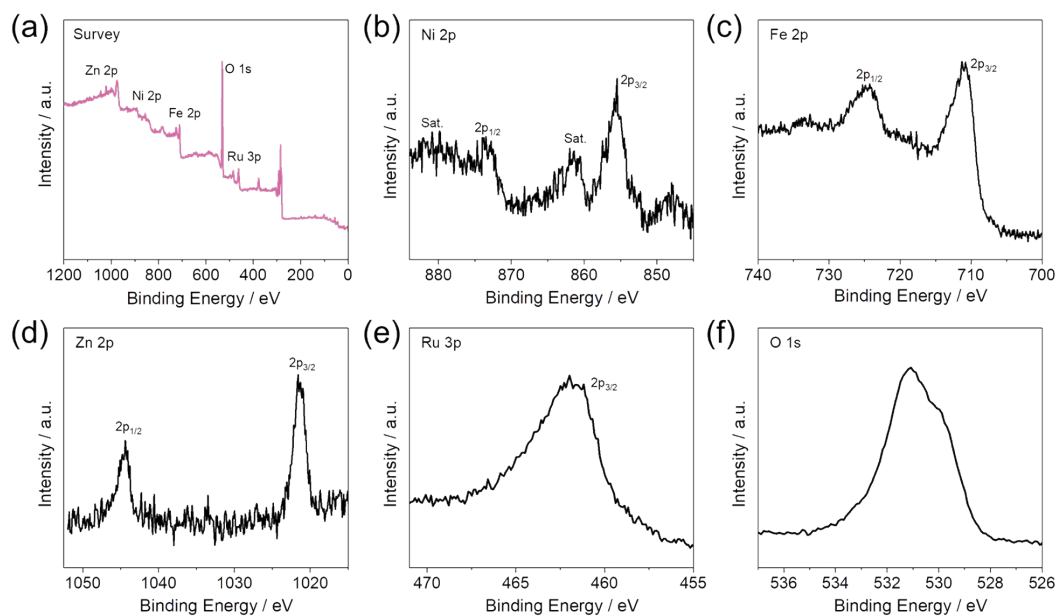

**Fig. S24.** (a) The XPS survey spectrum, (b) Ni 2p, (c) Fe 2p, (d) Zn 2p, (e) Ru 3p and (f) O 1s spectra of the D/NFF-Ru-Zn after HER stability test for 100 h.

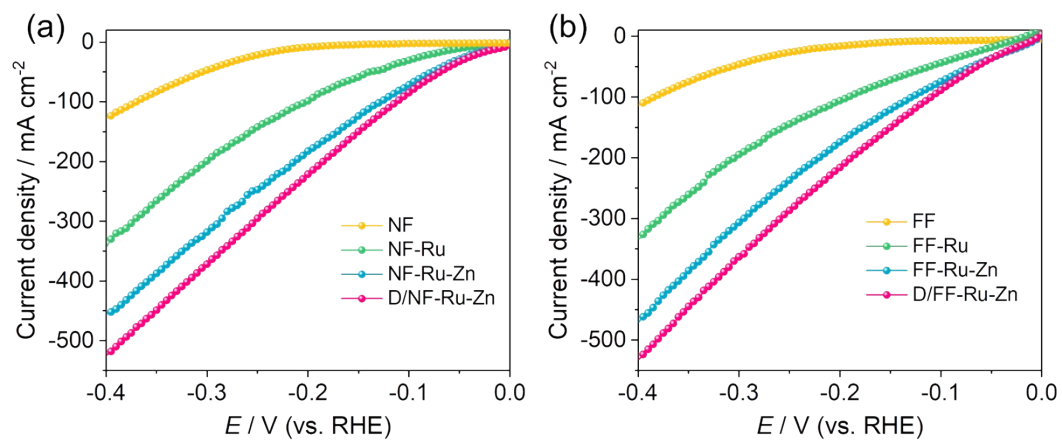

**Fig. S25.** HER polarization curves of samples derived from (a) Ni foam (NF) and (b) Fe foam (FF) substrates prepared by corrosion-etching strategy.

**Table S1.** Comparison of overpotentials and Tafel slopes with recently reported HER catalysts at 100 mA cm<sup>-2</sup> in 1.0 M KOH.

| Catalysts                                 | Overpotential / mV | Tafel slope / mV dec <sup>-1</sup> | References |
|-------------------------------------------|--------------------|------------------------------------|------------|
| D/NFF-Ru-Zn                               | 90                 | 41                                 | This work  |
| A-NiCo LDH/NF                             | 151                | 57                                 | 1          |
| NC/Ni <sub>3</sub> Mo <sub>3</sub> N/NF   | 136                | 41.5                               | 2          |
| V-FeP                                     | 149                | 40.97                              | 3          |
| NiFe/NF                                   | 132                | 33.2                               | 4          |
| F-Co <sub>2</sub> P/Fe <sub>2</sub> P/IF  | 151.8              | 115.01                             | 5          |
| Co <sub>4</sub> N-CeO <sub>2</sub> /NF    | 149                | 56.8                               | 6          |
| CF@Ru-CoCH NWs                            | 121                | 65                                 | 7          |
| TiO <sub>2</sub> @CoCH                    | 187                | 80                                 | 8          |
| Sn-Ni(OH) <sub>2</sub>                    | 298                | 65.5                               | 9          |
| F, P-Fe <sub>3</sub> O <sub>4</sub> /IF   | 179.5              | 127.9                              | 10         |
| NiCo <sub>2</sub> N                       | 149                | 78.7                               | 11         |
| NiCoP-NWAs/NF                             | 197                | 54                                 | 12         |
| Ni <sub>1.8</sub> Cu <sub>0.2</sub> -P/NF | 245                | 70                                 | 13         |
| 200-SMN/NF                                | 278                | 72.9                               | 14         |
| V-Ni <sub>3</sub> S <sub>2</sub> /NW      | 350                | 112                                | 15         |

## References

- 1 H. Yang, Z. Chen, P. Guo, B. Fei and R. Wu, *Appl. Catal. B-Environ.*, 2020, **261**, 118240.
- 2 Y. Chen, J. Yu, J. Jia, F. Liu, Y. Zhang, G. Xiong, R. Zhang, R. Yang, D. Sun, H. Liu and W. Zhou, *Appl. Catal. B-Environ.*, 2020, **272**, 118956.
- 3 X.-Y. Zhang, F.-T. Li, Z.-N. Shi, B. Dong, Y.-W. Dong, Z.-X. Wu, L. Wang, C.-G. Liu and Y.-M. Chai, *J. Colloid Interface Sci.*, 2022, **615**, 445-455.
- 4 L. Xu, L. Cao, W. Xu and Z. Pei, *Appl. Surf. Sci.*, 2020, **503**, 144122.
- 5 X.-Y. Zhang, Y.-R. Zhu, Y. Chen, S.-Y. Dou, X.-Y. Chen, B. Dong, B.-Y. Guo, D.-P. Liu, C.-G. Liu and Y.-M. Chai, *Chem. Eng. J.*, 2020, **399**, 125831.
- 6 M. Lu, D. Chen, B. Wang, R. Li, D. Cai, H. Tu, H. Yang, Y. Zhang and W. Han, *J. Mater. Chem. A*, 2021, **9**, 1655-1662.
- 7 J. Li, Q. Zhou, Z. Shen, S. Li, J. Pu, C. Zhong, M. Cao, X. Jin, H. Zhang, Y. Wang and H. Ma, *Electrochim. Acta*, 2020, **331**, 135367.
- 8 L. Yuan, S. Liu, S. Xu, X. Yang, J. Bian, C. Lv, Z. Yu, T. He, Z. Huang, D. W. Boukhalov, C. Cheng, Y. Huang and C. Zhang, *Nano Energy*, 2021, **82**, 105732.
- 9 J. Jian, X. Kou, H. Wang, L. Chang, L. Zhang, S. Gao, Y. Xu and H. Yuan, *ACS Appl. Mater. Interfaces*, 2021, **13**, 42861-42869.
- 10 X.-Y. Zhang, F.-T. Li, R.-Y. Fan, J. Zhao, B. Dong, F.-L. Wang, H.-J. Liu, J.-F. Yu, C.-G. Liu and Y.-M. Chai, *J. Mater. Chem. A*, 2021, **9**, 15836-15845.
- 11 L. Yu, S. Song, B. McElhenny, F. Ding, D. Luo, Y. Yu, S. Chen and Z. Ren, *J. Mater. Chem. A*, 2019, **7**, 19728-19732.
- 12 J. Li, G. Wei, Y. Zhu, Y. Xi, X. Pan, Y. Ji, I. V. Zatonovsky and W. Han, *J. Mater. Chem. A*, 2017, **5**, 14828-14837.
- 13 S. Chu, W. Chen, G. Chen, J. Huang, R. Zhang, C. Song, X. Wang, C. Li and K. Ostrikov, *Appl. Catal. B-Environ.*, 2019, **243**, 537-545.
- 14 Z. Cui, Y. Ge, H. Chu, R. Baines, P. Dong, J. Tang, Y. Yang, P. M. Ajayan, M. Ye and J. Shen, *J. Mater. Chem. A*, 2017, **5**, 1595-1602.
- 15 Y. Qu, M. Yang, J. Chai, Z. Tang, M. Shao, C. T. Kwok, M. Yang, Z. Wang, D. Chua, S. Wang, Z. Lu and H. Pan, *ACS Appl. Mater. Interfaces*, 2017, **9**, 5959-5967.
